# Supplementary material for: Biomarkers-in-Cardiology 8 RE-VISITED—Consistent Safety of Early Discharge with a Dual Marker Strategy Combining a Normal hs-cTnT with a Normal Copeptin in Low-to-Intermediate Risk Patients with Suspected Acute Coronary Syndrome—A Secondary Analysis of the Randomized Biomarkers-in-Cardiology 8 Trial
Source: MDPI journal article supplement (doi:10.3390/cells11020211), 2022-01-08
Supplement: s1 [file s1]

**Table S1.** MACE categories.

|                                             | <b>BIC8 Original</b>                |                                     | <b>BIC8 RE-VISITED</b>              |                                     |
|---------------------------------------------|-------------------------------------|-------------------------------------|-------------------------------------|-------------------------------------|
|                                             | <b>Standard Group<br/>(n = 451)</b> | <b>Copeptin Group<br/>(n = 451)</b> | <b>Standard Group<br/>(n = 422)</b> | <b>Copeptin Group<br/>(n = 414)</b> |
| MACE at 30 days                             | 23                                  | 23                                  | 18                                  | 18                                  |
| All Cause Death                             | 2                                   | 0                                   | 2                                   | 0                                   |
| Myocardial Infarction                       | 3                                   | 8                                   | 0                                   | 5                                   |
| Rehospitalisation for ACS (not<br>ambulant) | 5                                   | 2                                   | 5                                   | 2                                   |
| Acute unplanned PCI                         | 13                                  | 11                                  | 11                                  | 9                                   |
| CABG                                        | 0                                   | 2                                   | 0                                   | 2                                   |

MACE: major adverse cardiac events; ACS: acute coronary syndrome; PCI: percutaneous coronary intervention; CABG: coronary artery bypass graft.

**Table S2.** Timing of experimental and standard serial troponin strategy.

|                                                              | <b>All Patients<br/>(n = 836)</b> | <b>Standard Group<br/>(n = 422)</b> | <b>Copeptin Group<br/>(n = 414)</b> |
|--------------------------------------------------------------|-----------------------------------|-------------------------------------|-------------------------------------|
| Troponin 0 h (yes)                                           | 836                               | 422                                 | 414                                 |
| Troponin 3 h (yes)                                           | 384                               | 327                                 | 57                                  |
| Troponin 6 h (yes)                                           | 218                               | 188                                 | 30                                  |
| Troponin 3 h and 6 h (yes)                                   | 156                               | 136                                 | 20                                  |
| DMS eligible (Copeptin < 10 pmol/L + hs-cTnT 0 h) < 14 ng/L) | 683                               | 340                                 | 343                                 |

All patients have hs-TnT at 0h; values for Troponin at 3h and 6h refer to TnT, TnI or hs-TnT.  
Abbreviation: DMS: dual marker strategy.

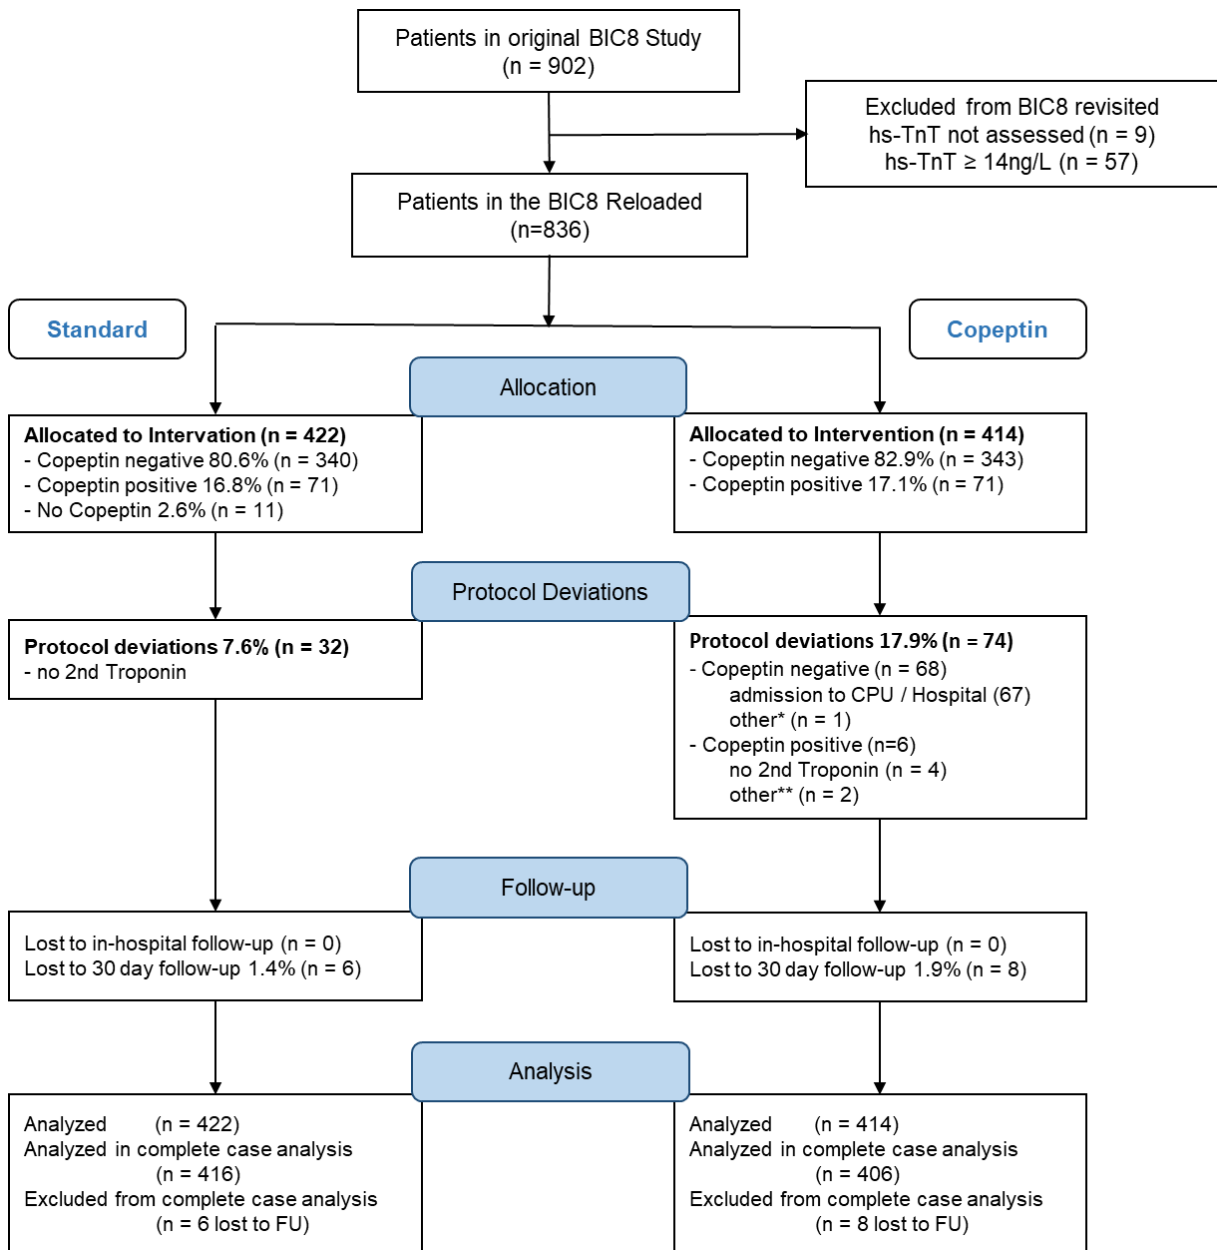

**Figure S1.** Consort diagram.

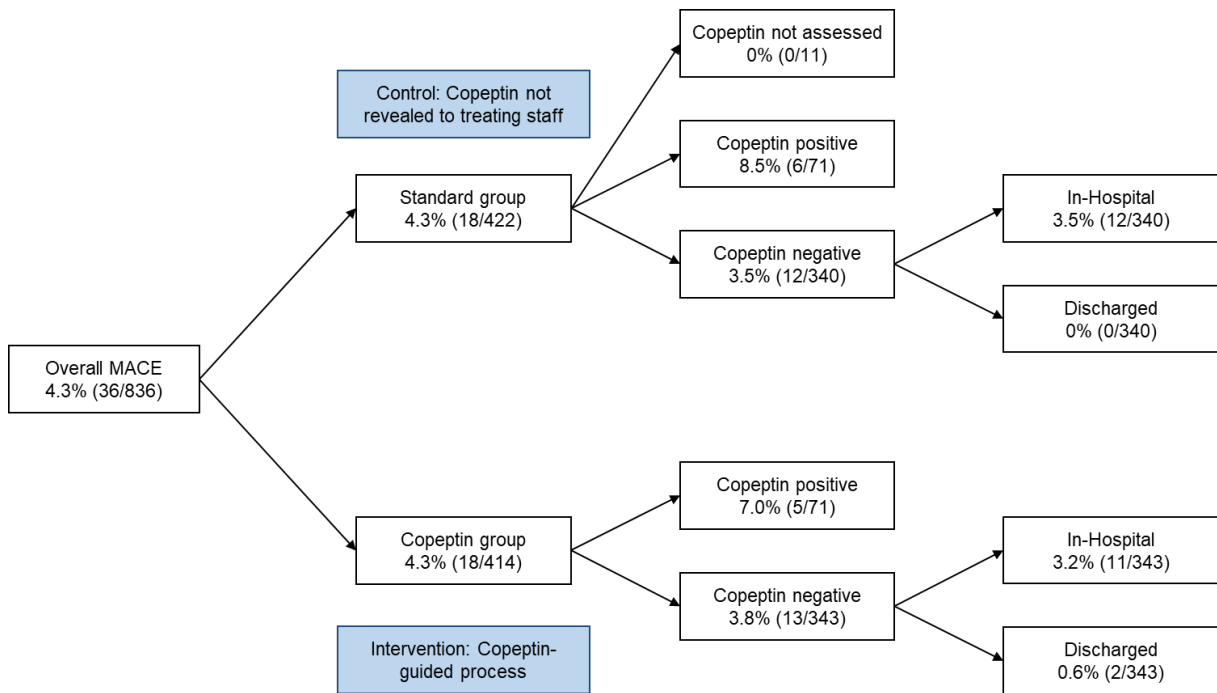

**Figure S2.** Major adverse cardiac events (MACE) proportions in study groups and in coceptin subgroups.
